# Supplementary material
Source: Research Square preprint supplement (doi:10.21203/rs.3.rs-8998946/v1)
Supplement: Supplementary file 2 [file 9fc8efa529baba94b91fb51f.docx]

**Table of Contents Entry**


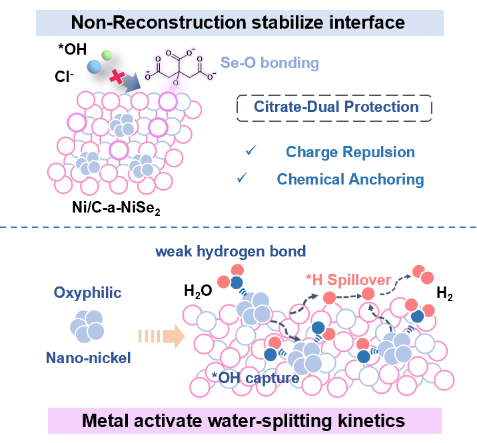


The Citrate ions via Se–O bonds stabilize non-reconstructive interface while metallic-nickel activates the spillover effect, promoting the water-splitting kinetics.
